# Supplementary material for: Brown Bear Food-Probability Models in West-European Russia: On the Way to the Real Resource Selection Function
Source: MDPI journal article supplement (doi:10.3390/f13081247), 2022-08-07
Supplement: s1 [file s1]

Archive with 1 entries (1 files):
- forests-1825928-supplementary.pdf
